# Supplementary material
Source: publisher figshare collection journal article supplement (https://future-science-group.figshare.com/ndownloader/files/34257560)
Supplement: Supplementary file 1 [file 34257560]

| | **Supplementary Table 1.** Risk factors for AKI | | | | | | | | | --- | --- | --- | --- | --- | --- | --- | --- | | **AKI** | **Univariate analysis** | | |  | **Multivariate analysis** | | | | **Odd ratio** | **95% CI** | **P value** | **Odd ratio** | **95% CI** | **P value** | | Age | 1.022 | 0.997-1.047 | 0.088 |  | 1.015 | 0.987-1.043 | 0.304 | | Male | 0.909 | 0.522-1.582 | 0.735 |  | 0.845 | 0.470-1.517 | 0.573 | | Baseline eGFR | 0.991 | 0.982-1.000 | **0.044** |  | 0.993 | 0.984-1.001 | 0.101 | | Hypertension | 1.641 | 0.972-2.773 | 0.064 |  | 1.218 | 0.670-2.216 | 0.518 | | NSAIDs | 2.703 | 1.457-5.015 | **0.002** |  | 2.801 | 1.487-5.273 | **0.001** | | RAASis | 2.300 | 1.276-4.144 | **0.006** |  | 1.806 | 0.931-3.500 | 0.080 | | PPIs | 1.518 | 0.630-3.659 | 0.352 |  |  |  |  | | AKI, acute kidney injury; eGFR, estimated glomerular filtration rate; irAEs, immune-related adverse events; NSAIDs, nonsteroidal anti-inflammatory drugs; RAASis, renin-angiotensin-aldosterone system inhibitors. | | | | | | | |   **.** Risk factors for AKI | | | | | | | |
| --- | --- | --- | --- | --- | --- | --- | --- | --- | --- | --- | --- | --- | --- | --- | --- | --- | --- | --- | --- | --- | --- | --- | --- | --- | --- | --- | --- | --- | --- | --- | --- | --- | --- | --- | --- | --- | --- | --- | --- | --- | --- | --- | --- | --- | --- | --- | --- | --- | --- | --- | --- | --- | --- | --- | --- | --- | --- | --- | --- | --- | --- | --- | --- | --- | --- | --- | --- | --- | --- | --- | --- | --- | --- | --- | --- | --- | --- | --- | --- | --- | --- | --- | --- | --- | --- | --- | --- | --- | --- | --- | --- | --- | --- |
| **AKI** | **Univariate analysis** | | |  | **Multivariate analysis** | | |
| **Odd ratio** | **95% CI** | **P value** | **Odd ratio** | **95% CI** | **P value** |
| Age | 1.022 | 0.997-1.047 | 0.088 |  | 1.015 | 0.987-1.043 | 0.304 |
| Male | 0.909 | 0.522-1.582 | 0.735 |  | 0.845 | 0.470-1.517 | 0.573 |
| Baseline eGFR | 0.991 | 0.982-1.000 | **0.044** |  | 0.993 | 0.984-1.001 | 0.101 |
| Hypertension | 1.641 | 0.972-2.773 | 0.064 |  | 1.218 | 0.670-2.216 | 0.518 |
| NSAIDs | 2.703 | 1.457-5.015 | **0.002** |  | 2.801 | 1.487-5.273 | **0.001** |
| RAASis | 2.300 | 1.276-4.144 | **0.006** |  | 1.806 | 0.931-3.500 | 0.080 |
| PPIs | 1.518 | 0.630-3.659 | 0.352 |  | 1.072 | 0.425-2.701 | 0.883 |
| Extra-renal irAEs | 2.128 | 1.184-3.825 | 0.012 |  | 2.028 | 1.099-3.740 | **0.024** |
| AKI, acute kidney injury; eGFR, estimated glomerular filtration rate; irAEs, immune-related adverse events; NSAIDs, nonsteroidal anti-inflammatory drugs; RAASis, renin-angiotensin-aldosterone system inhibitors. | | | | | | | |
